# Supplementary material for: Isostructural iron(iii) spin crossover complexes with a tridentate Schiff base-like ligand: X-ray structures and magnetic properties
Source: Royal Society of Chemistry journal article supplement (doi:10.1039/c9dt00846b), 2019-01-01
Supplement: c9dt00846b1.pdf [file c9dt00846b1.pdf]

Supporting Information for:

## Isostructural iron(III) spin crossover complexes with a tridentate Schiff base-like ligand: X-ray structures and magnetic properties

Katja Dankhoff and Birgit Weber\*

---

Department of Chemistry, University of Bayreuth, Universitätsstr. 30, 95447 Bayreuth, Germany. E-mail: weber@uni-bayreuth.de; Tel: +49(0)921552555

### Experimental:

The ligand HL was synthesised as published previously.<sup>1</sup> All other chemicals were commercially available and used without further purification. CHN analyses were measured with a Vario El III from Elementar AnalysenSysteme. Samples were prepared in a tin boat, and acetanilide was used as standard. Mass spectra were recorded with a Finnigan MAT 8500 with a data system MASPEC II. IR spectra were recorded with a Perkin Elmer Spectrum 100 FT-IR spectrometer.

[FeL<sub>2</sub>]BF<sub>4</sub> (**1**). HL (0.2 g, 0.9 mmol, 1 eq), sodium acetate (0.05 g, 0.9 mmol, 1 eq), and iron(III) nitrate nonahydrate (0.22 g, 0.55 mmol, 0.6 eq) were dissolved in ethanol (20 mL) and the resulting purple solution was heated to reflux for 1 h. After cooling to room temperature, approximately half of the solvent was removed under reduced pressure. Sodium tetrafluoroborate (1.14 g, 10 mmol, 25 eq) was dissolved in 20 mL water and added to the purple solution. The mixture was stirred at room temperature for 10 min, the resulting purple solid was filtrated, washed with a few mL of water and dried *in vacuo*. Yield: 0.10 g (577.15 g·mol<sup>-1</sup>, 40 %). Elemental analysis (C<sub>24</sub>H<sub>26</sub>BF<sub>4</sub>FeN<sub>4</sub>O<sub>4</sub>, %) measured (calcd.): C 49.32 (49.95), H 4.30 (4.54), N 9.56 (9.71). MS (EI, pos.) *m/z* (%): 490 (C<sub>24</sub>H<sub>26</sub>FeN<sub>4</sub>O<sub>4</sub>, 36), 93 (C<sub>6</sub>H<sub>6</sub>N, 100) 43 (C<sub>2</sub>H<sub>3</sub>O, 25). IR:  $\nu$  = 1579 (s, C=O), 1568 (s, C=O) cm<sup>-1</sup>.

[FeL<sub>2</sub>]ClO<sub>4</sub> (**2**). HL (0.2 g, 0.9 mmol, 1 eq), sodium acetate (0.05 g, 0.9 mmol, 1 eq), and iron(III) nitrate nonahydrate (0.22 g, 0.55 mmol, 0.6 eq) were dissolved in ethanol (20 mL) and the resulting purple solution was heated to reflux for 1 h. After cooling to room temperature, approximately half of the solvent was removed under reduced pressure. Barium perchlorate trihydrate (5.37 g, 10 mmol, 25 eq) was dissolved in 20 mL water and added to the purple solution. The mixture was stirred at room temperature for 10 min, the resulting purple solid was filtrated, washed with a few mL of water and dried *in vacuo*. Yield: 0.14 g (589.79 g·mol<sup>-1</sup>, 43 %). IR:  $\nu$  = 1579 (s, C=O), 1567 (s, C=O) cm<sup>-1</sup>.

### Single crystal X-ray structure analysis

X-ray structure analysis of the crystals was performed with a Stoe StadiVari diffractometer using graphite-monochromated MoK $\alpha$  radiation. The data were corrected for Lorentz and polarization effects. The structures were solved by direct methods (SIR-97)<sup>2</sup> and refined by fullmatrix least-square techniques against Fo<sup>2</sup>-Fc<sup>2</sup> (SHELXL-2017).<sup>3</sup> All hydrogen atoms were calculated in idealised positions with fixed displacement parameters. ORTEP-III<sup>4</sup> was used for the structure representation, SCHAKAL-99<sup>5</sup> to illustrate molecule packing. The Hirshfeld surfaces were mapped with  $d_{\text{norm}}$ , and 2D fingerprint plots were generated using CrystalExplorer 17.5.<sup>6</sup> Graphical plots of the molecular Hirshfeld surfaces use a red-white-blue colour scheme. Red highlights contacts shorter than the van der Waals separation, contacts around the van der Waals separation are white, and blue is used for longer contacts.

CCDC (1898802–1898805) contain the supplementary crystallographic data for this paper. These data can be obtained free of charge from The Cambridge Crystallographic Data Centre.

## Magnetic measurements

Magnetic measurements on the compounds were carried out using a SQUID MPMS-XL5 from Quantum Design with an applied field of 5000 G, and in the temperature range from 300 to 50 K in settle and in sweep (5 K/min) mode. The sample was prepared in a gelatine capsule held in a plastic straw. The raw data were corrected for the diamagnetic part of the sample holder and the diamagnetism of the organic ligand using tabulated Pascal's constants.<sup>7</sup>

**Table S1.** Crystallographic data for the complexes at different temperatures presented in this work.

|                                            | <b>1-HS</b>                                                                       | <b>1-LS</b>                                                                       | <b>2-HS</b>                                                                        | <b>2-LS</b>                                                                        |
|--------------------------------------------|-----------------------------------------------------------------------------------|-----------------------------------------------------------------------------------|------------------------------------------------------------------------------------|------------------------------------------------------------------------------------|
| CCDC                                       | 1898802                                                                           | 1898803                                                                           | 1898804                                                                            | 1898805                                                                            |
| formula                                    | C <sub>24</sub> H <sub>26</sub> FeN <sub>4</sub> O <sub>4</sub> , BF <sub>4</sub> | C <sub>24</sub> H <sub>26</sub> FeN <sub>4</sub> O <sub>4</sub> , BF <sub>4</sub> | C <sub>24</sub> H <sub>26</sub> FeN <sub>4</sub> O <sub>4</sub> , ClO <sub>4</sub> | C <sub>24</sub> H <sub>26</sub> FeN <sub>4</sub> O <sub>4</sub> , ClO <sub>4</sub> |
| sum formula                                | C <sub>24</sub> H <sub>26</sub> BF <sub>4</sub> FeN <sub>4</sub> O <sub>4</sub>   | C <sub>24</sub> H <sub>26</sub> BF <sub>4</sub> FeN <sub>4</sub> O <sub>4</sub>   | C <sub>24</sub> H <sub>26</sub> ClFeN <sub>4</sub> O <sub>8</sub>                  | C <sub>24</sub> H <sub>26</sub> ClFeN <sub>4</sub> O <sub>8</sub>                  |
| <i>M</i> / g mol <sup>-1</sup>             | 577.15                                                                            | 577.15                                                                            | 589.79                                                                             | 589.79                                                                             |
| crystal system                             | orthorhombic                                                                      | orthorhombic                                                                      | orthorhombic                                                                       | orthorhombic                                                                       |
| space group                                | <i>P</i> 2 <sub>1</sub> 2 <sub>1</sub> 2 <sub>1</sub>                             | <i>P</i> 2 <sub>1</sub> 2 <sub>1</sub> 2 <sub>1</sub>                             | <i>P</i> 2 <sub>1</sub> 2 <sub>1</sub> 2 <sub>1</sub>                              | <i>P</i> 2 <sub>1</sub> 2 <sub>1</sub> 2 <sub>1</sub>                              |
| crystal description                        | purple plate                                                                      | purple plate                                                                      | purple plate                                                                       | purple plate                                                                       |
| <i>a</i> / Å                               | 8.6392(3)                                                                         | 8.6111(3)                                                                         | 8.6776(3)                                                                          | 8.6347(3)                                                                          |
| <i>b</i> / Å                               | 16.7578(5)                                                                        | 16.4406(5)                                                                        | 16.8062(8)                                                                         | 16.5568(7)                                                                         |
| <i>c</i> / Å                               | 17.6029(8)                                                                        | 17.5177(8)                                                                        | 17.6168(6)                                                                         | 17.5497(6)                                                                         |
| $\alpha$ / °                               | 90                                                                                | 90                                                                                | 90                                                                                 | 90                                                                                 |
| $\beta$ / °                                | 90                                                                                | 90                                                                                | 90                                                                                 | 90                                                                                 |
| $\gamma$ / °                               | 90                                                                                | 90                                                                                | 90                                                                                 | 90                                                                                 |
| <i>V</i> / Å <sup>3</sup>                  | 2548.44(16)                                                                       | 2480.01(16)                                                                       | 2569.19(17)                                                                        | 2508.96(16)                                                                        |
| <i>Z</i>                                   | 4                                                                                 | 4                                                                                 | 4                                                                                  | 4                                                                                  |
| $\rho_{\text{calcd}}$ / g cm <sup>-3</sup> | 1.504                                                                             | 1.546                                                                             | 1.525                                                                              | 1.561                                                                              |
| $\mu$ / mm <sup>-1</sup>                   | 0.660                                                                             | 0.678                                                                             | 0.747                                                                              | 0.765                                                                              |
| crystal size/ mm                           | 0.115×0.052×0.029                                                                 | 0.115×0.052×0.029                                                                 | 0.087×0.078×0.038                                                                  | 0.087×0.078×0.038                                                                  |
| <i>F</i> (000)                             | 1188                                                                              | 1188                                                                              | 1220                                                                               | 1220                                                                               |
| <i>T</i> / K                               | 175                                                                               | 133                                                                               | 150                                                                                | 100                                                                                |
| $\lambda$ / Å                              | Mo-K $\alpha$ 0.71073                                                             | Mo-K $\alpha$ 0.71073                                                             | Mo-K $\alpha$ 0.71073                                                              | Mo-K $\alpha$ 0.71073                                                              |
| $\theta$ range/ °                          | 1.7–28.5                                                                          | 2.3–28.6                                                                          | 2.3–28.5                                                                           | 2.3–28.5                                                                           |
| Reflns. collected                          | 12870                                                                             | 14682                                                                             | 13721                                                                              | 13617                                                                              |
| Indep. reflns. ( <i>R</i> <sub>int</sub> ) | 5894 (0.054)                                                                      | 5782 (0.062)                                                                      | 6016 (0.045)                                                                       | 5863 (0.039)                                                                       |
| Parameters                                 | 343                                                                               | 343                                                                               | 343                                                                                | 343                                                                                |
| <i>R</i> 1 (all data)                      | 0.0461                                                                            | 0.0477                                                                            | 0.0405                                                                             | 0.0368                                                                             |
| <i>wR</i> 2                                | 0.0940                                                                            | 0.0975                                                                            | 0.0705                                                                             | 0.0649                                                                             |
| GooF                                       | 0.89                                                                              | 0.89                                                                              | 0.89                                                                               | 0.90                                                                               |
| Flack <i>x</i>                             | −0.030(17)                                                                        | −0.02(2)                                                                          | −0.022(13)                                                                         | −0.001(12)                                                                         |

**Figure S1.** ORTEP drawing of **1** in the HS state (top) and LS state (bottom). Ellipsoids were drawn at 50 % probability level. Hydrogen atoms were omitted for clarity.

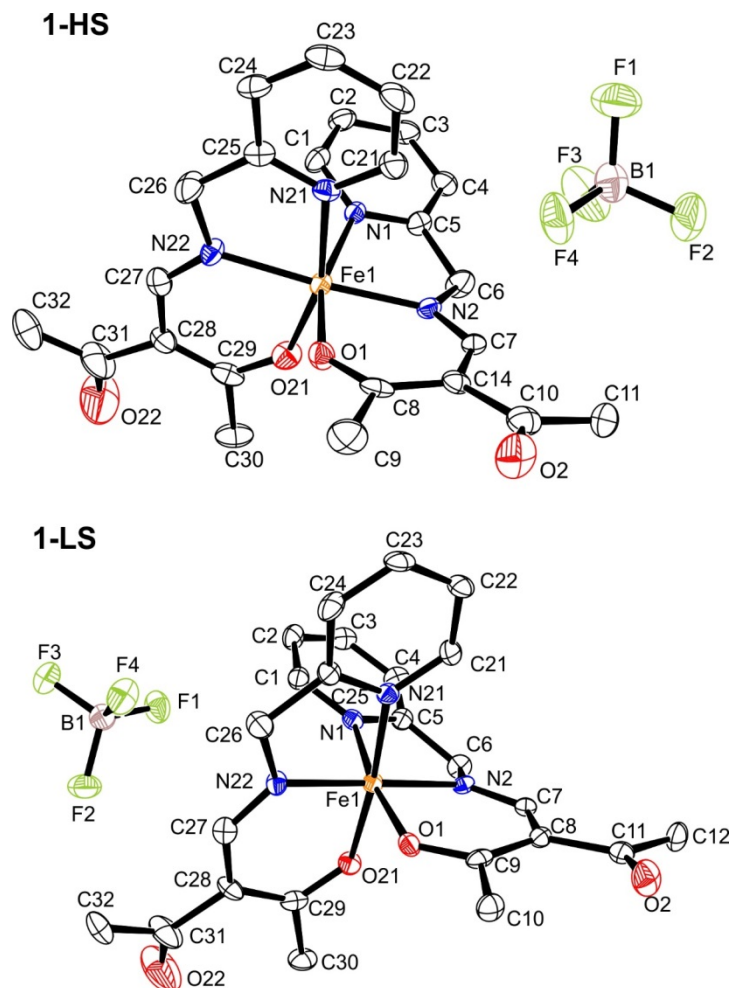

**Figure S2.** ORTEP drawing of **2** in the HS state (top) and LS state (bottom). Ellipsoids were drawn at 50 % probability level. Hydrogen atoms were omitted for clarity.

### 2-HS

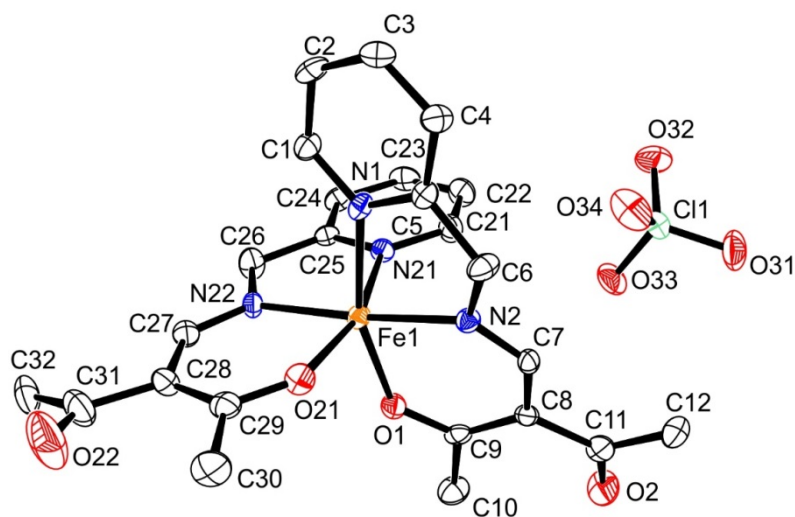

### 2-LS

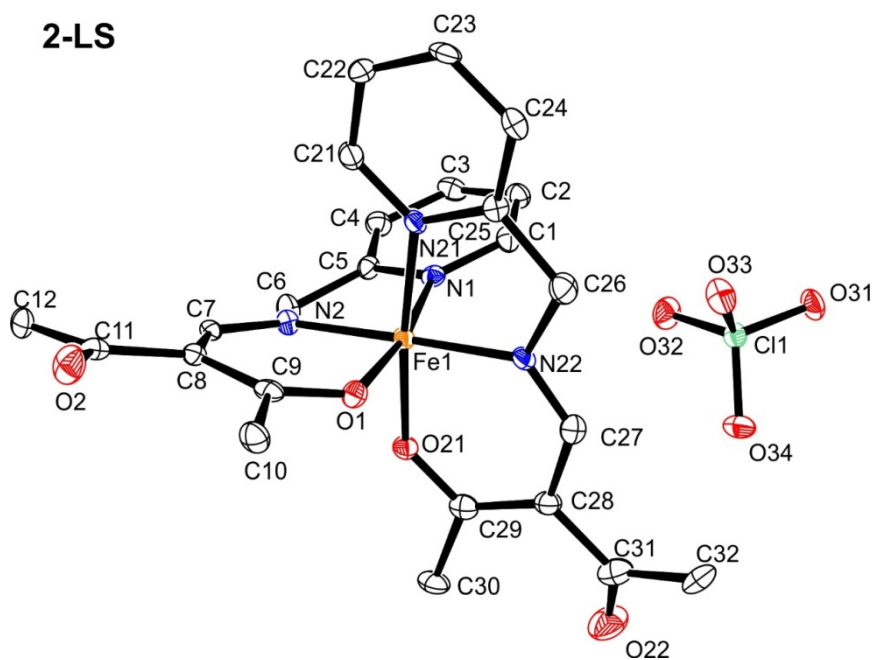

**Table S2.** Summary of the C–H $\cdots\pi$  interactions of the complexes presented in this work.

|             |          | C <sub>g</sub>                       | H $\cdots$ C <sub>g</sub> /Å<br>Y $\cdots$ C <sub>g</sub> /Å | X–H $\cdots$ C <sub>g</sub> /°<br>X–Y $\cdots$ C <sub>g</sub> /° | X $\cdots$ C <sub>g</sub> /Å |
|-------------|----------|--------------------------------------|--------------------------------------------------------------|------------------------------------------------------------------|------------------------------|
| <b>1-HS</b> | C3–H3    | Fe1–O21–C29–C28–C27–N22 <sup>a</sup> | 2.95                                                         | 153                                                              | 3.818(6)                     |
|             | C30–H30B | N21–C21–C22–C23–C24–C25 <sup>b</sup> | 2.72                                                         | 134                                                              | 3.470(5)                     |
| <b>1-LS</b> | C30–H30B | N21–C21–C22–C23–C24–C25 <sup>c</sup> | 2.61                                                         | 143                                                              | 3.444(5)                     |
| <b>2-HS</b> | C3–H3    | Fe1–O21–C29–C28–C27–N22 <sup>d</sup> | 2.95                                                         | 153                                                              | 3.824(4)                     |
|             | C30–H30C | N21–C21–C22–C23–C24–C25 <sup>c</sup> | 2.73                                                         | 134                                                              | 3.481(4)                     |
| <b>2-LS</b> | C30–H30C | N21–C21–C22–C23–C24–C25 <sup>b</sup> | 2.59                                                         | 148                                                              | 3.465(4)                     |

a: 3/2–x, 2–y, –1/2+z; b: 1+x, y, z; c: –1+x, y, z; d: 1/2–x, –y, 1/2+z.

**Table S3.** Hydrogen bonds and angles of complexes presented in this work.

|             | Donor    | Acceptor         | D–H/Å | H $\cdots$ A/Å | D $\cdots$ A/Å | D–H $\cdots$ A/° |
|-------------|----------|------------------|-------|----------------|----------------|------------------|
| <b>1-HS</b> | C1–H1    | F2 <sup>a</sup>  | 0.95  | 2.54           | 3.008(6)       | 111              |
|             | C7–H7    | O2 <sup>b</sup>  | 0.95  | 2.50           | 3.090(6)       | 121              |
|             | C21–H21  | F4 <sup>c</sup>  | 0.95  | 2.43           | 3.089(6)       | 126              |
|             | C23–H23  | F2 <sup>d</sup>  | 0.95  | 2.42           | 3.179(6)       | 137              |
|             | C24–H24  | F1 <sup>d</sup>  | 0.95  | 2.52           | 3.357(6)       | 146              |
|             | C26–H26B | F3 <sup>a</sup>  | 0.99  | 2.52           | 3.380(6)       | 145              |
|             | C32–H32B | O22 <sup>e</sup> | 0.98  | 2.31           | 3.253(8)       | 161              |
|             | C32–H32A | F1 <sup>a</sup>  | 0.98  | 2.49           | 3.320(6)       | 142              |
| <b>1-LS</b> | C7–H7    | O2 <sup>f</sup>  | 0.95  | 2.49           | 3.187(6)       | 131              |
|             | C21–H21  | F4 <sup>g</sup>  | 0.95  | 2.47           | 3.346(6)       | 152              |
|             | C23–H23  | F1 <sup>h</sup>  | 0.95  | 2.41           | 3.120(6)       | 132              |
|             | C24–H24  | F2 <sup>h</sup>  | 0.95  | 2.48           | 3.340(6)       | 151              |
|             | C32–H32A | F2 <sup>c</sup>  | 0.98  | 2.54           | 3.327(6)       | 137              |
|             | C32–H32B | O22 <sup>i</sup> | 0.98  | 2.36           | 3.308(7)       | 170              |
|             | C1–H1    | O31 <sup>k</sup> | 0.95  | 2.60           | 3.039(5)       | 109              |
|             | C7–H7    | O2 <sup>l</sup>  | 0.95  | 2.48           | 3.076(5)       | 120              |
| <b>2-HS</b> | C21–H21  | O33 <sup>c</sup> | 0.95  | 2.53           | 3.135(4)       | 121              |
|             | C23–H23  | O31 <sup>m</sup> | 0.95  | 2.43           | 3.192(5)       | 137              |
|             | C24–H24  | O32 <sup>m</sup> | 0.95  | 2.55           | 3.384(5)       | 147              |
|             | C26–H26A | O34 <sup>k</sup> | 0.99  | 2.52           | 3.377(5)       | 145              |
|             | C32–H32B | O22 <sup>n</sup> | 0.98  | 2.31           | 3.264(6)       | 166              |
|             | C32–H32C | O32 <sup>k</sup> | 0.98  | 2.54           | 3.323(6)       | 137              |
|             | C7–H7    | O2 <sup>o</sup>  | 0.95  | 2.49           | 3.198(4)       | 132              |
|             | C21–H21  | O33 <sup>p</sup> | 0.95  | 2.51           | 3.383(4)       | 153              |
| <b>2-LS</b> | C23–H23  | O32 <sup>q</sup> | 0.95  | 2.44           | 3.150(4)       | 131              |
|             | C24–H24  | O34 <sup>q</sup> | 0.95  | 2.50           | 3.364(4)       | 152              |
|             | C26–H26A | O33 <sup>c</sup> | 0.99  | 2.58           | 3.395(4)       | 140              |
|             | C32–H32B | O22 <sup>r</sup> | 0.98  | 2.39           | 3.347(4)       | 165              |
|             | C32–H32C | O34 <sup>c</sup> | 0.98  | 2.55           | 3.298(4)       | 133              |

a: 1–x, –1/2+y, 3/2–z; b: 1/2+x, 5/2–y, 2–z; c: x, y, z; d: –x, –1/2+y, 3/2–z; e: –1/2+x, 3/2–y, 2–z; f: –1/2+x, 5/2–y, 2–z; g: 2–x, –1/2+y, 3/2–z; h: 1+x, y, z; i: 1/2+x, 7/2–y, 2–z; k: 1–x, 1/2+y, 3/2–z; l: –1/2+x, –1/2–y, 1–z; m: 2–x, 1/2+y, 3/2–z; n: 1/2+x, 1/2–y, 1–z; o: 1/2+x, 1/2–y, –z; p: 1–x, 1/2+y, 1/2–z; q: –1+x, y, z; r: –1/2+x, –1/2–y, –z.

**Figure S3.** Hirshfeld surface mapped with  $d_{\text{norm}}$  (top left), fingerprint plots: full (top right), resolved into  $\text{H}\cdots\text{O}/\text{O}\cdots\text{H}$  (bottom left), and  $\text{H}\cdots\text{F}/\text{F}\cdots\text{H}$  (bottom right) contacts of complex **1-LS**.

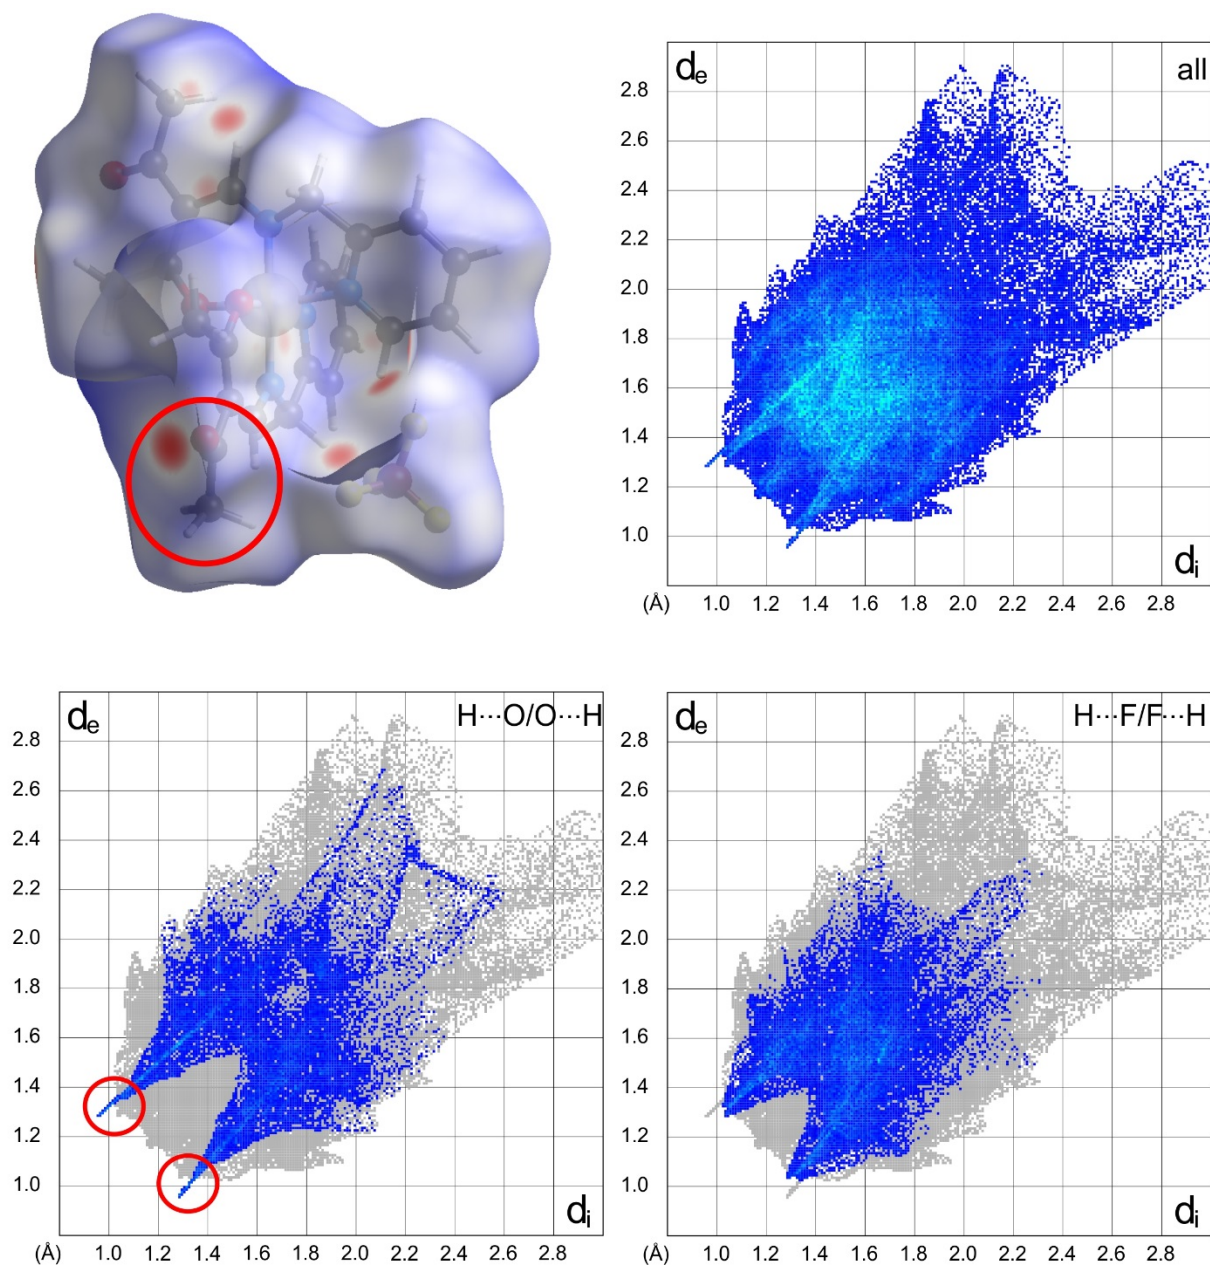

**Figure S4.** Hirshfeld surface mapped with  $d_{\text{norm}}$  (top left), fingerprint plots: full (top right), and resolved into  $\text{H}\cdots\text{O}/\text{O}\cdots\text{H}$  (bottom left) of complex **2-HS**.

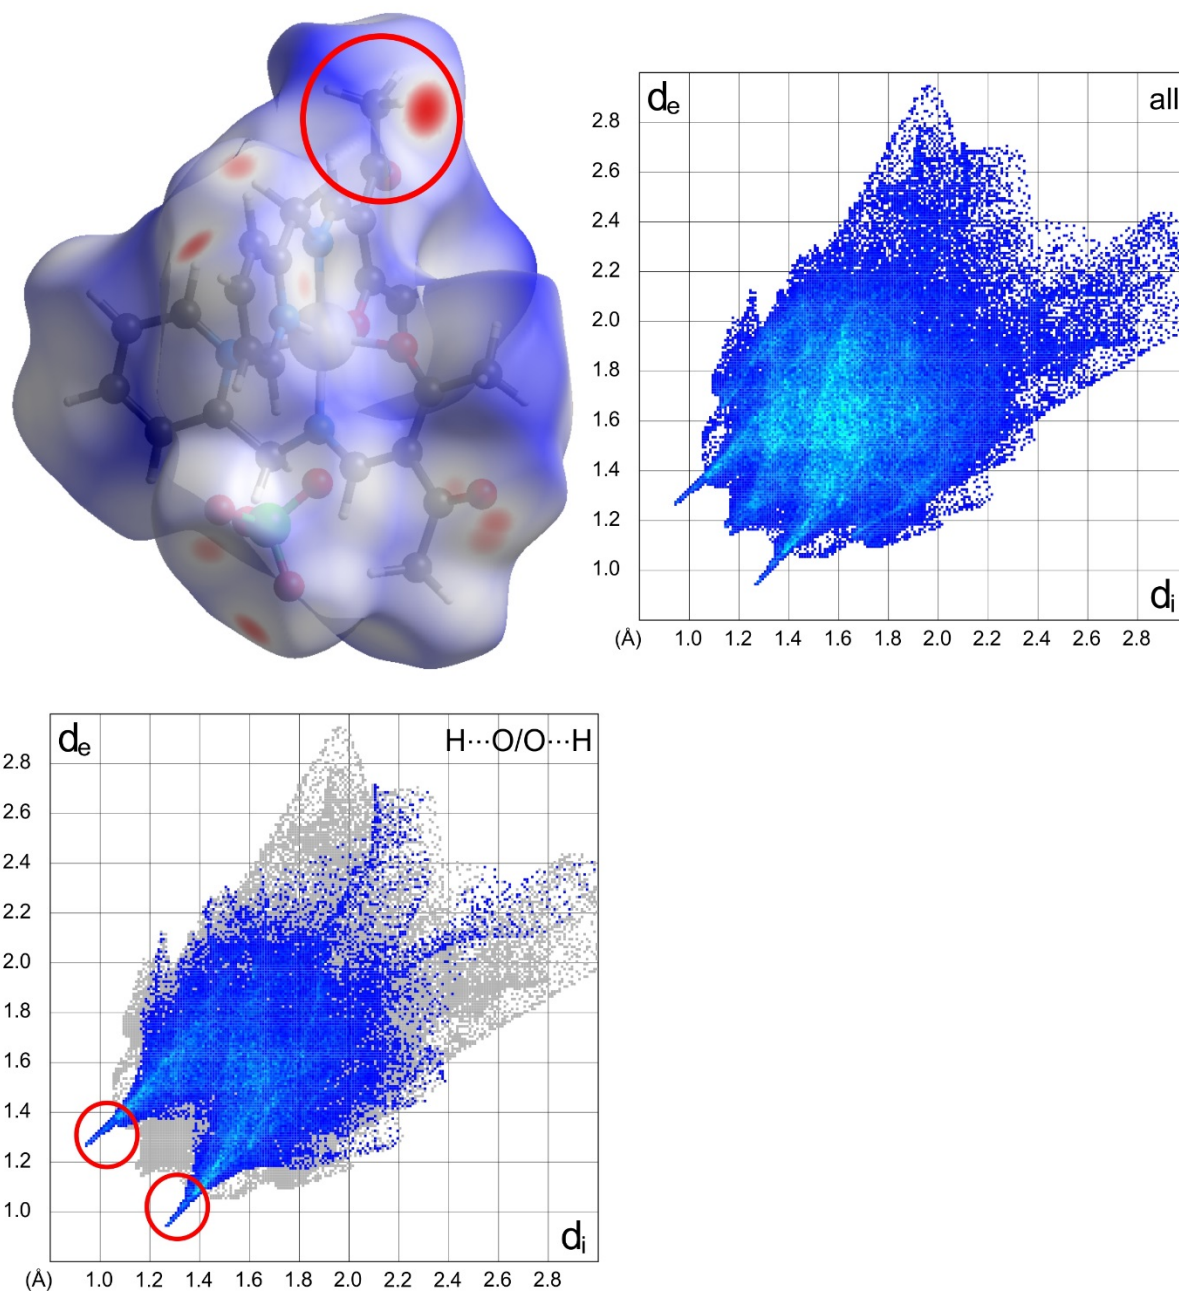



**Figure S5.** Hirshfeld surface mapped with  $d_{\text{norm}}$  (top left), fingerprint plots: full (top right), and resolved into  $\text{H}\cdots\text{O}/\text{O}\cdots\text{H}$  (bottom left) contacts of complex **2-LS**.

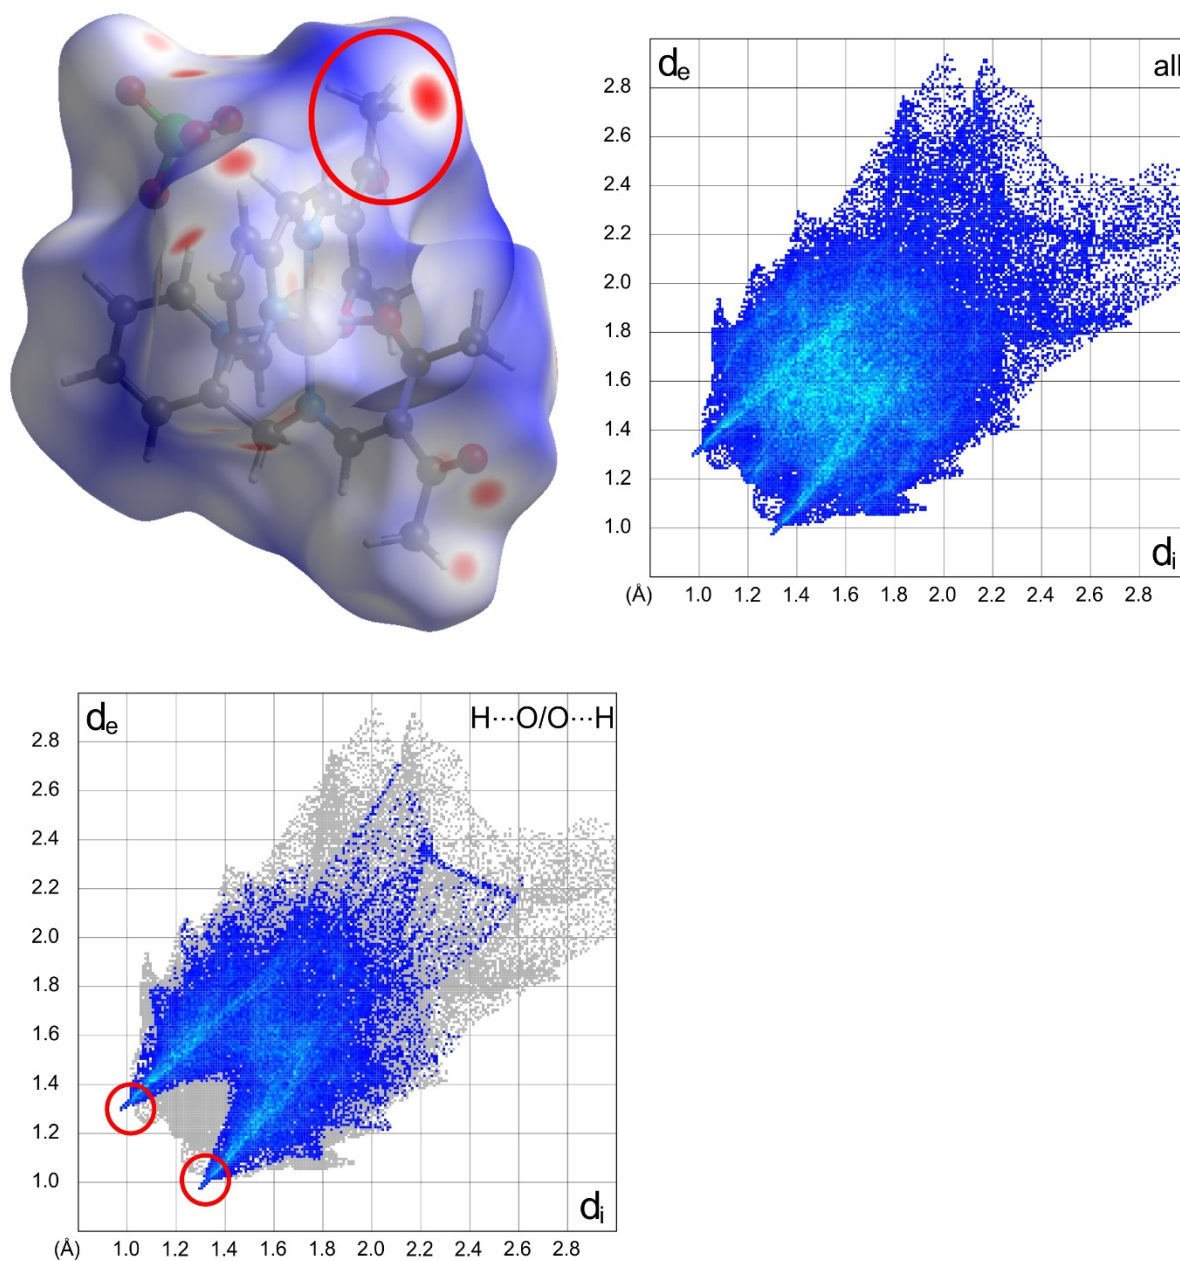

**Figure S6.** Plot of the  $\chi_M T$  product vs.  $T$  for complex **1** (left) and **2** (right) measured in sweep mode with a scan rate of 5 K/min.

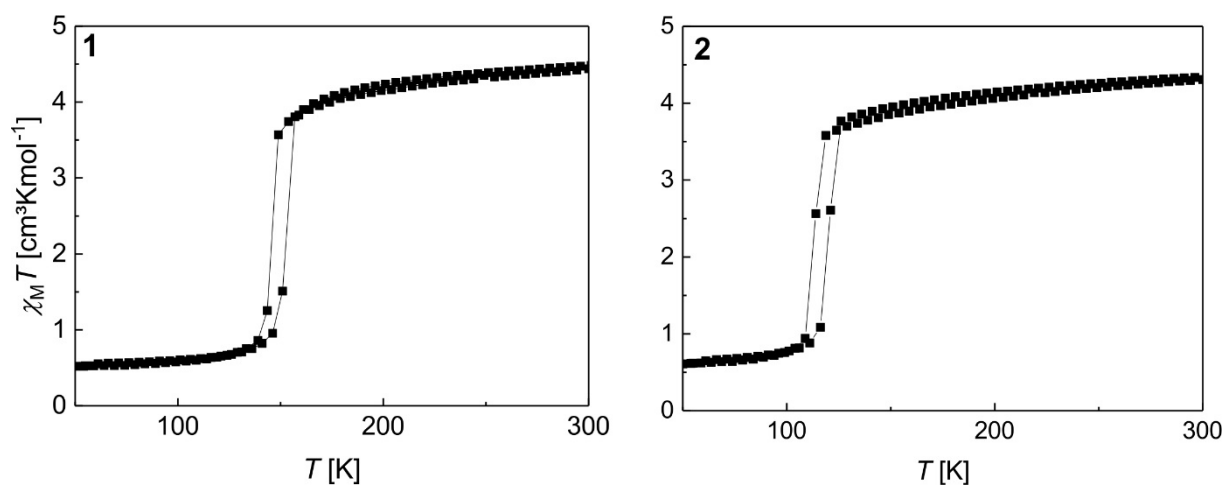



## References

- 1 K. Dankhoff and B. Weber, *CrystEngComm.*, 2018, **20**, 818–828.
- 2 A. Altomare, M. C. Burla, M. Camalli, G. L. Cascarano, C. Giacovazzo, A. Guagliardi, A. G. G. Moliterni, G. Polidori and R. Spagna, *J. Appl. Cryst.*, 1999, **32**, 115–119.
- 3 a) G. Sheldrick, *Acta Cryst. A*, 2008, **64**, 112–122; b) G. Sheldrick, *Acta Cryst. C*, 2015, **71**, 3–8.
- 4 a) C. K. Johnson and M. N. Burnett, ORTEP-III, Oak-Ridge National Laboratory, Oak-Ridge, TN, 1996; b) L. Farrugia, *J. Appl. Cryst.*, 1997, **30**, 565.
- 5 E. Keller, Schkal-99, University of Freiburg, Freiburg, Germany, 1999.
- 6 M. J. Turner, J. J. McKinnon, S. K. Wolff, D. J. Grimwood, P. R. Spackman, D. Jayatilaka and M. A. Spackman, CrystalExplorer17 (2017). University of Western Australia.
- 7 O. Kahn, *Molecular Magnetism*, VCH, New York, N.Y, 1993.
